# Supplementary material
Source: PubMed Central journal article supplement (PMC3511605)

**Related to Figure 1f**

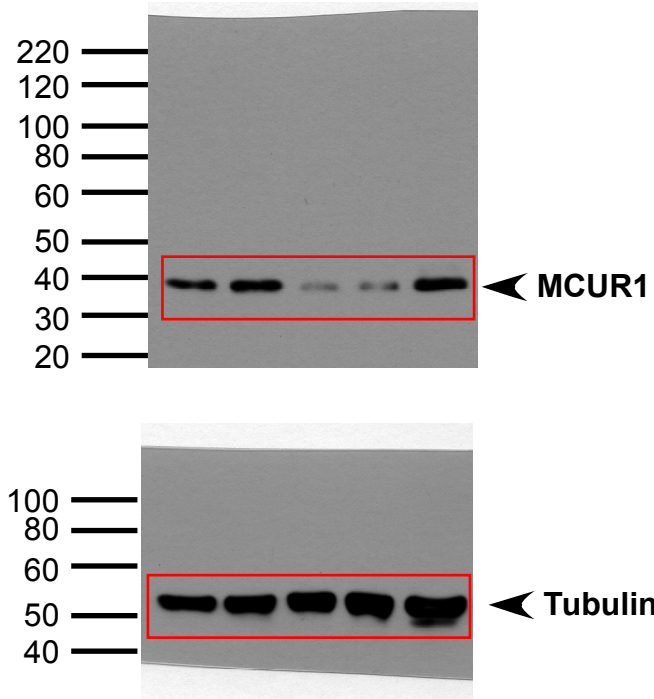

**Related to Figure 5d,e,f,g**

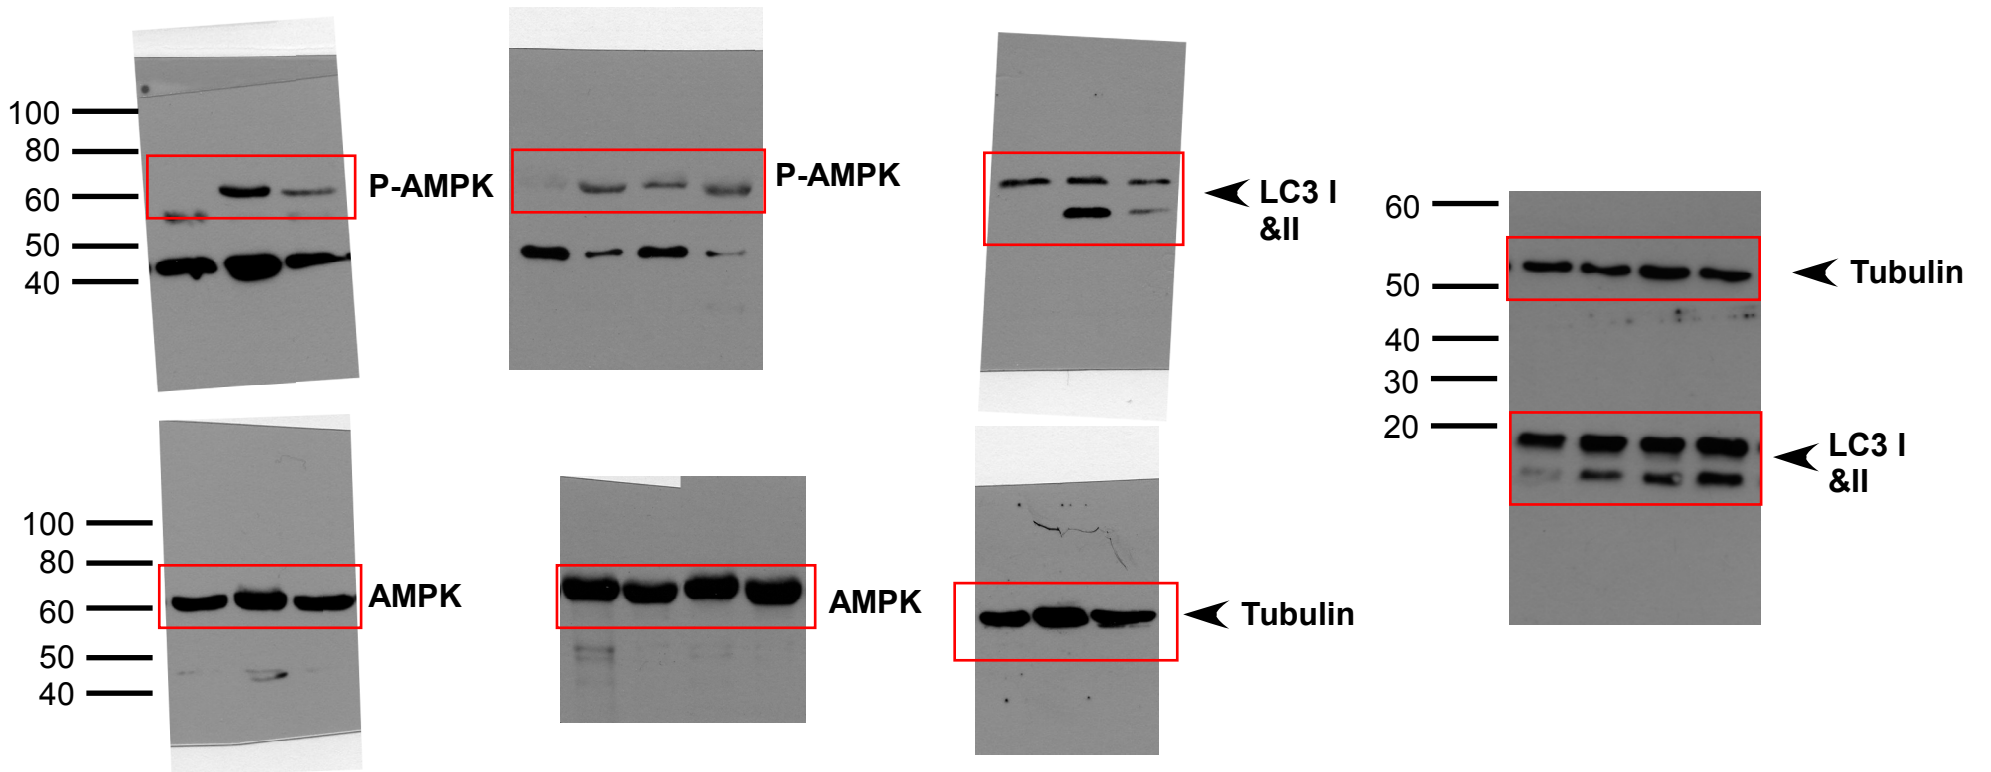

### Related to Figure 3c

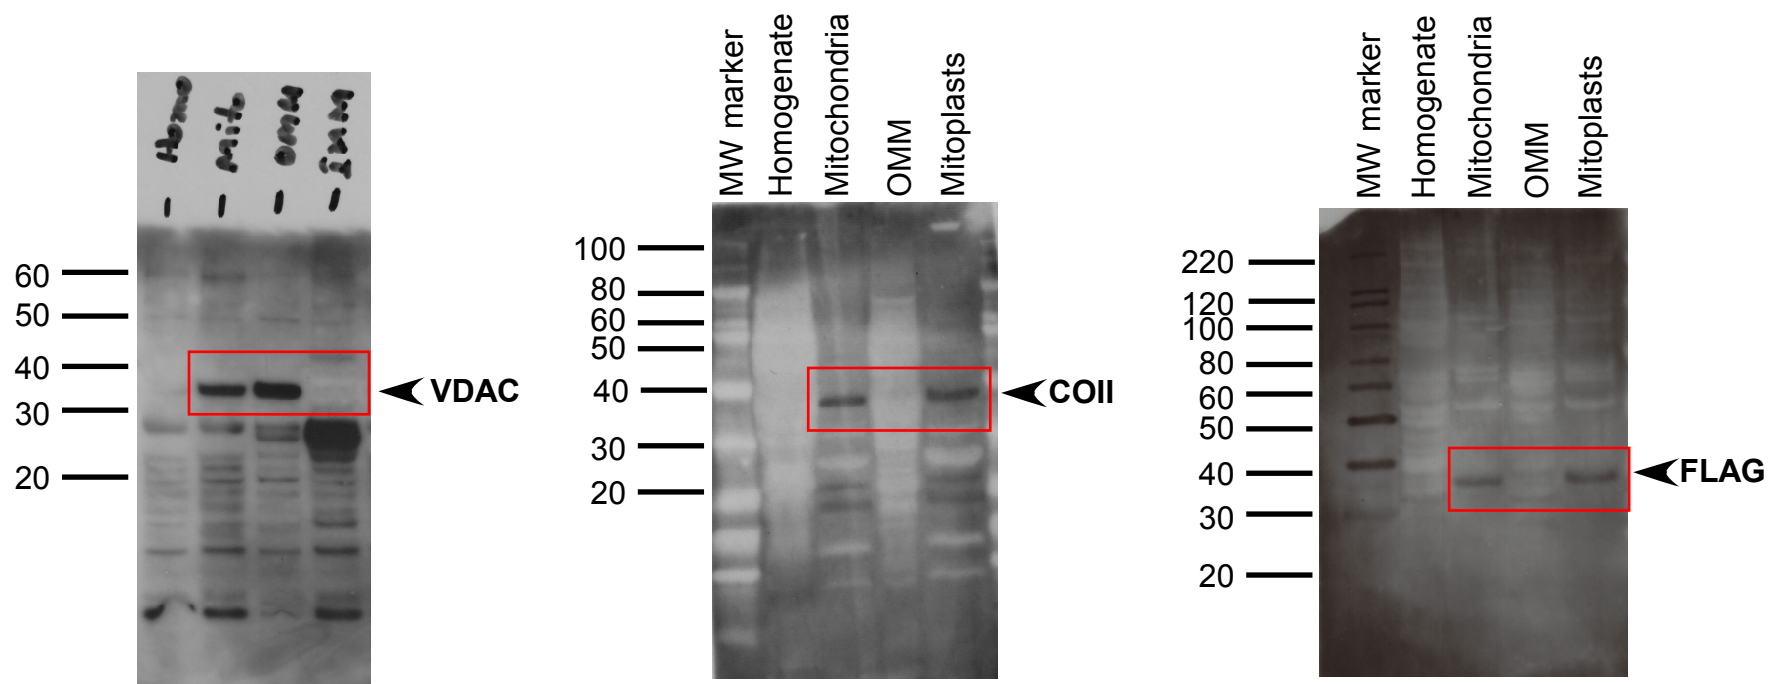

### Related to Figure 3d

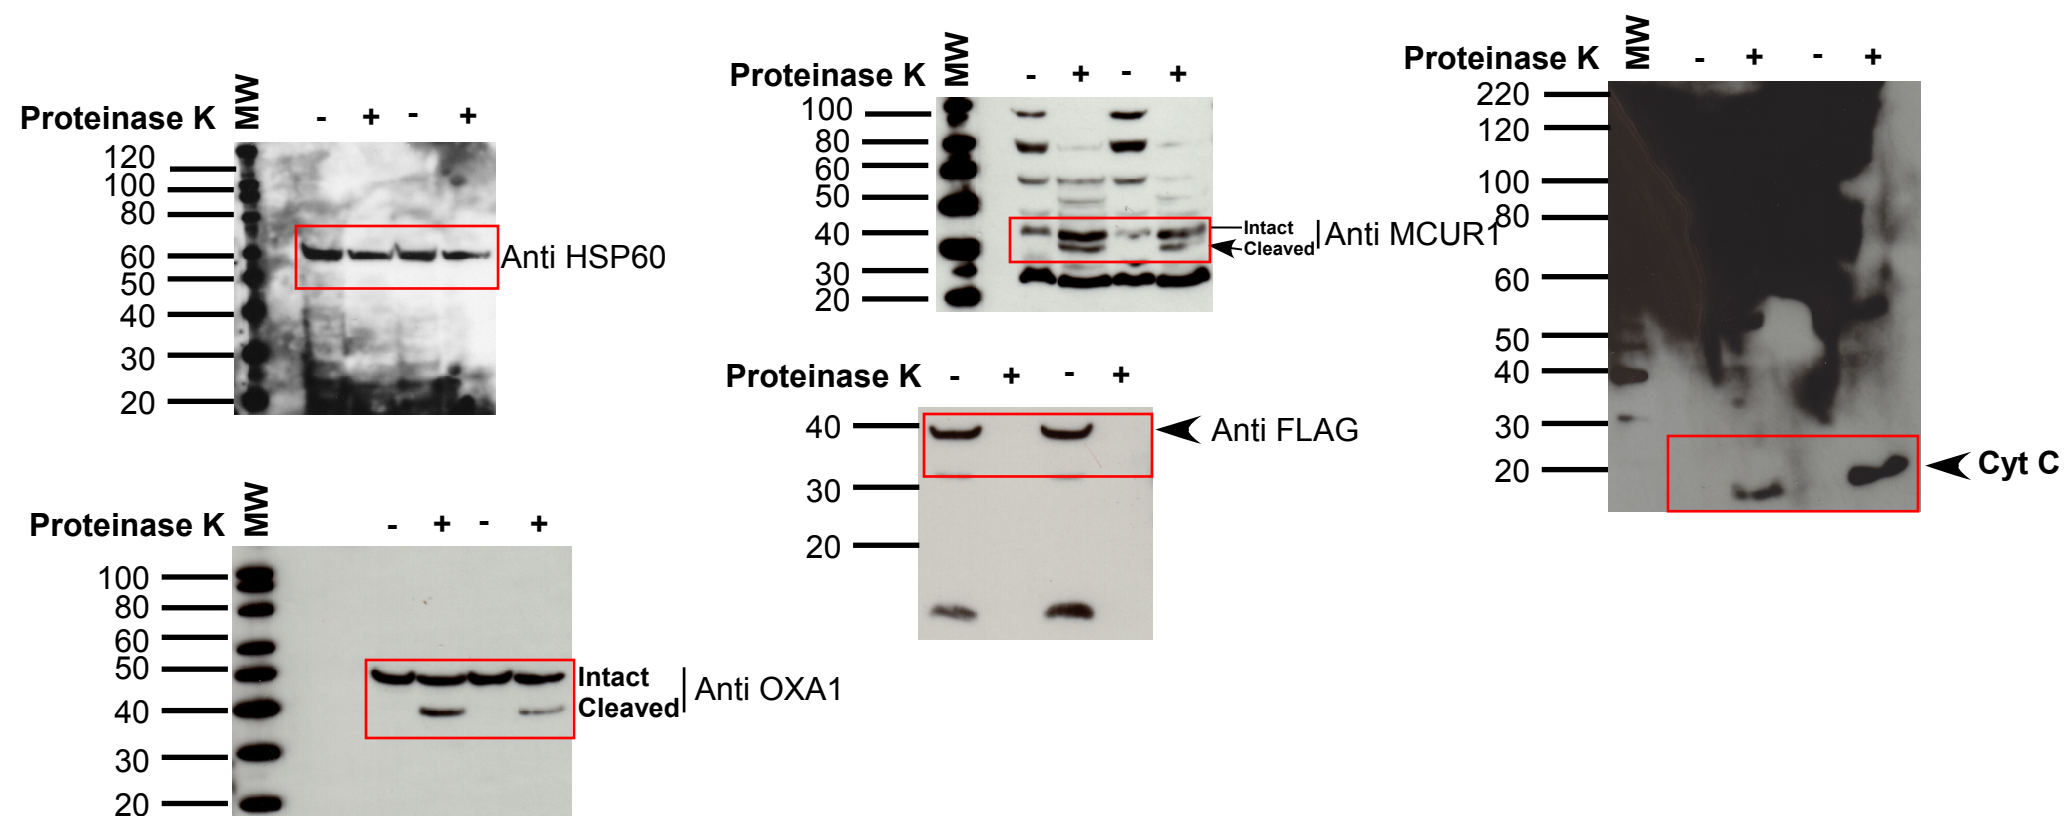

### Related to Figure 3g

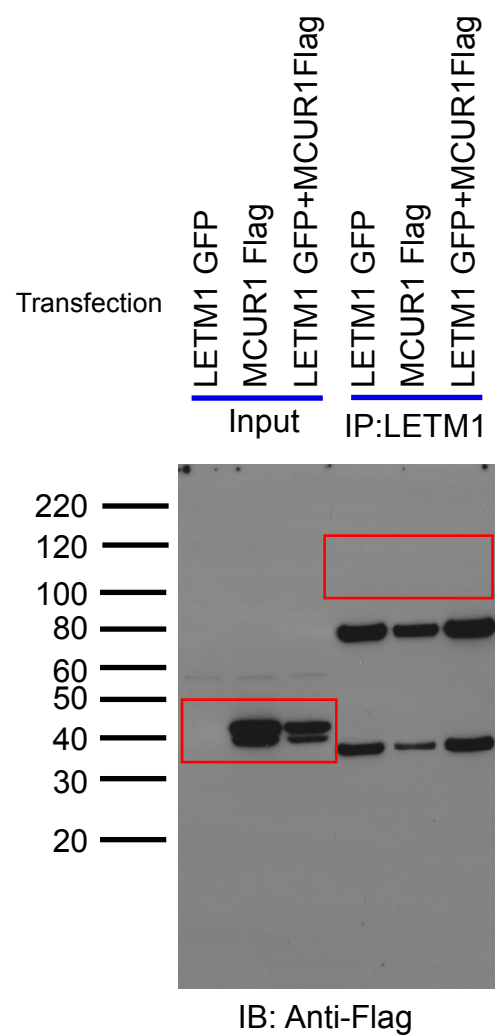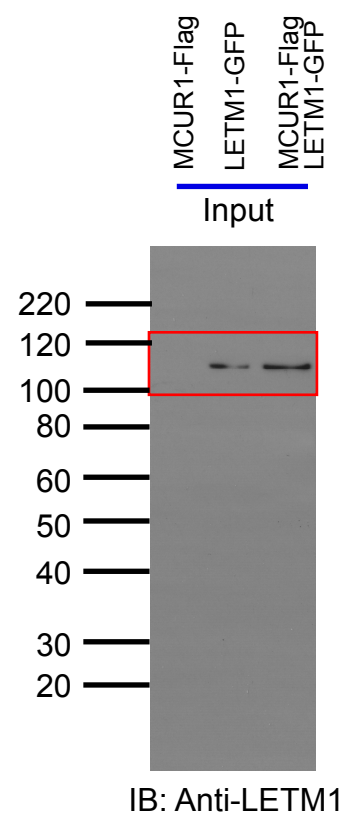

### Related to Figure 3h

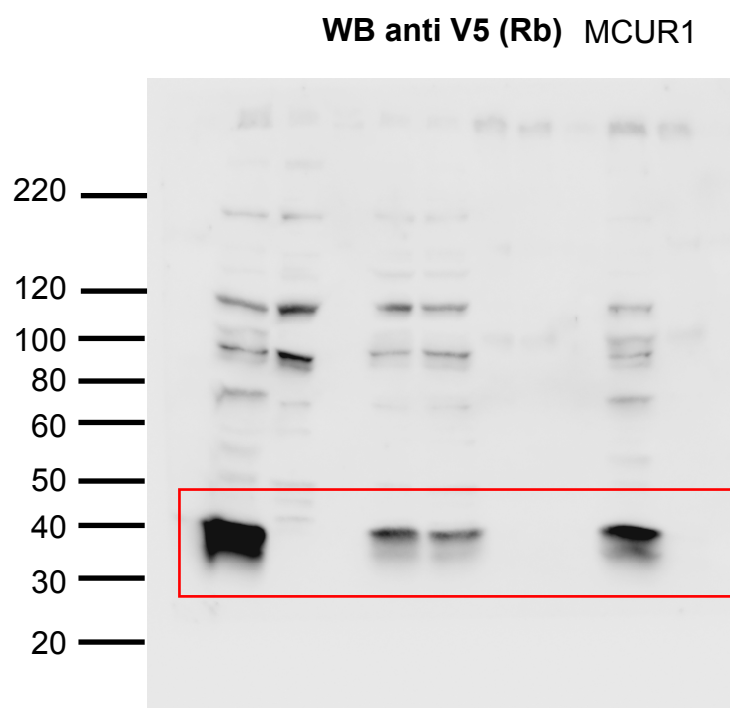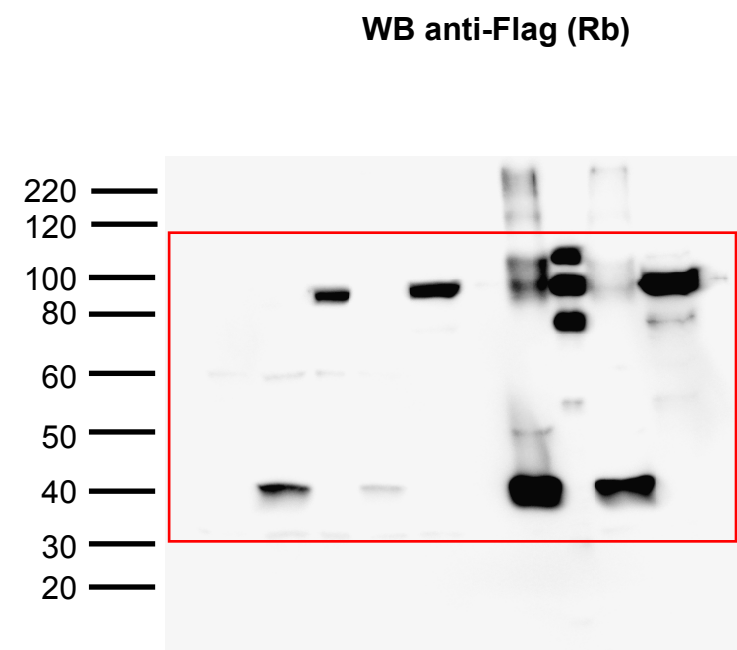



**Related to Figure 3e**

10/17 - 21/11

- transfection q0A-Flag, miu-GFP plasmid into cos-7 cells  
90% confluence cells.
- ~~single~~ single transfection: 15µg DNA (13.5µl lipofectamine 2000)
- co-transfection: 7.5µg + 7.5µg DNA (13.5µl lipofectamine 2000)
- 20h of transfection, cells were harvest. lysate in 1xPBS  
1/5 Triton X100, protease inhibitor (Sigma)

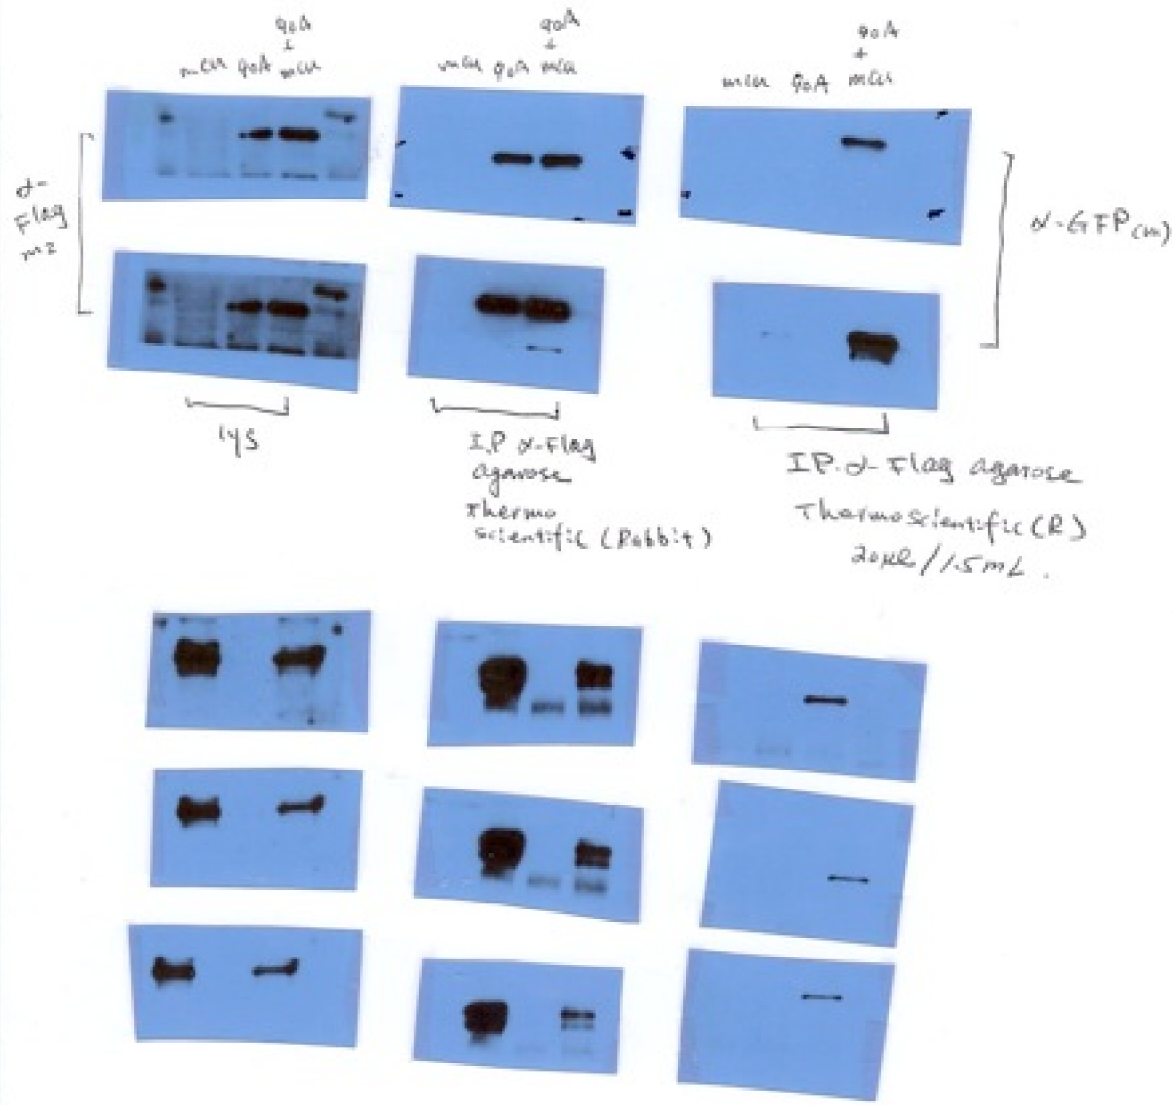

**Related to Figure 3f**

- transfect q0A-Flag / miu-GFP  
miu1 / miu GFP } into cos-7 cells
- 33µg DNA each + 0.9x lipofectamine 2000 (33µg/30µl - single)  
(66µg/60µl - co-transfection)
- 20µg total cellular lysate for W.B using α-GFP (m) all signal.

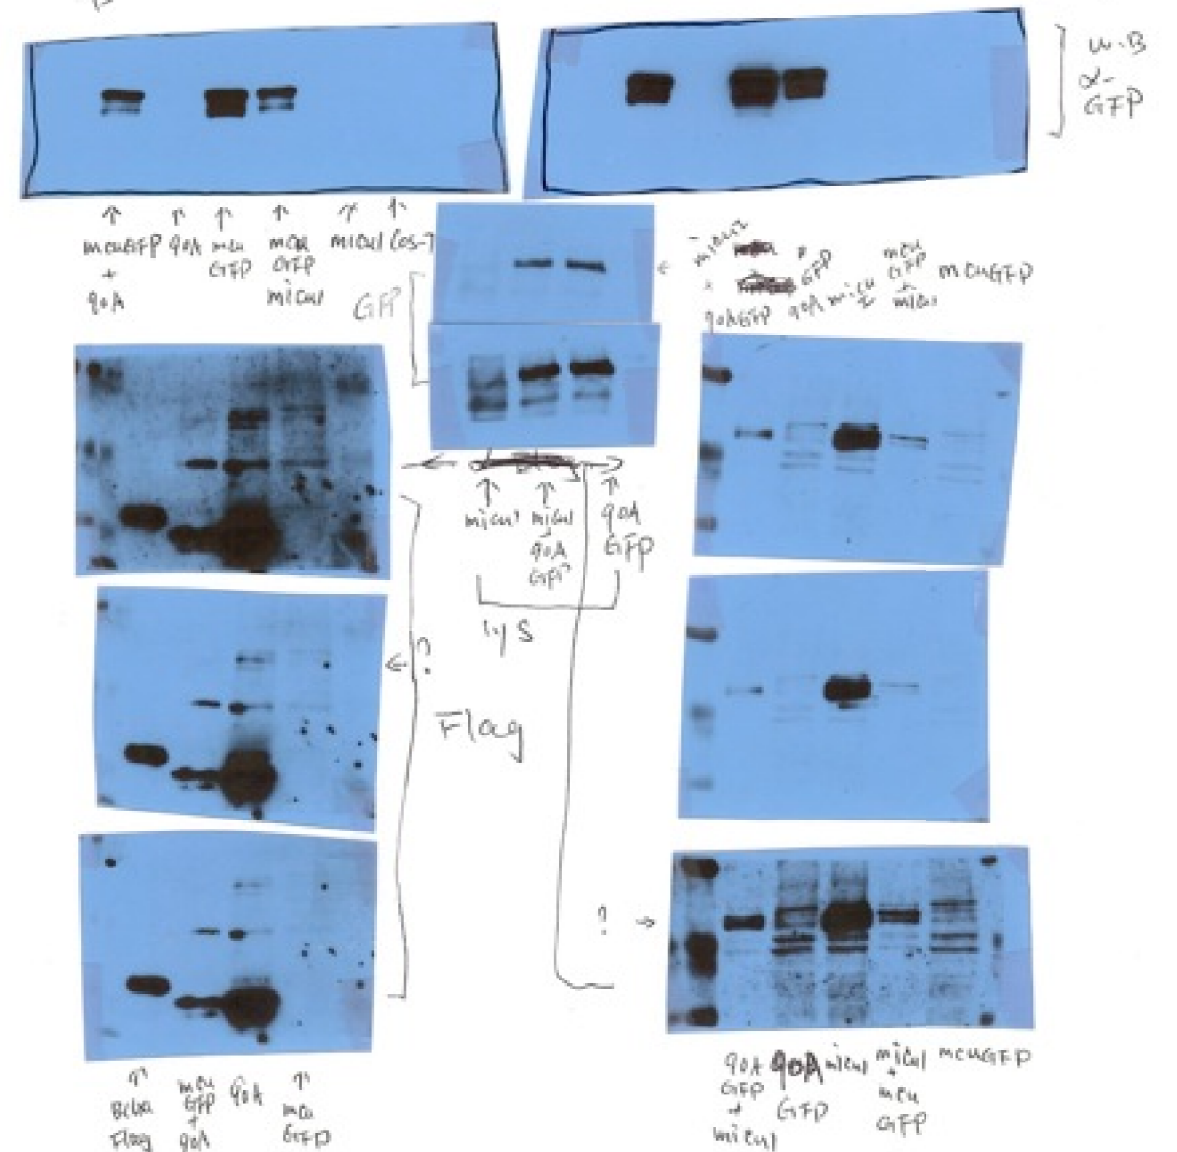

**Related to Figure 3f**

- IP: cos-7 transfected using GFP-miu/q0A or GFP miu/miu1  
α-Flag agarose (R)

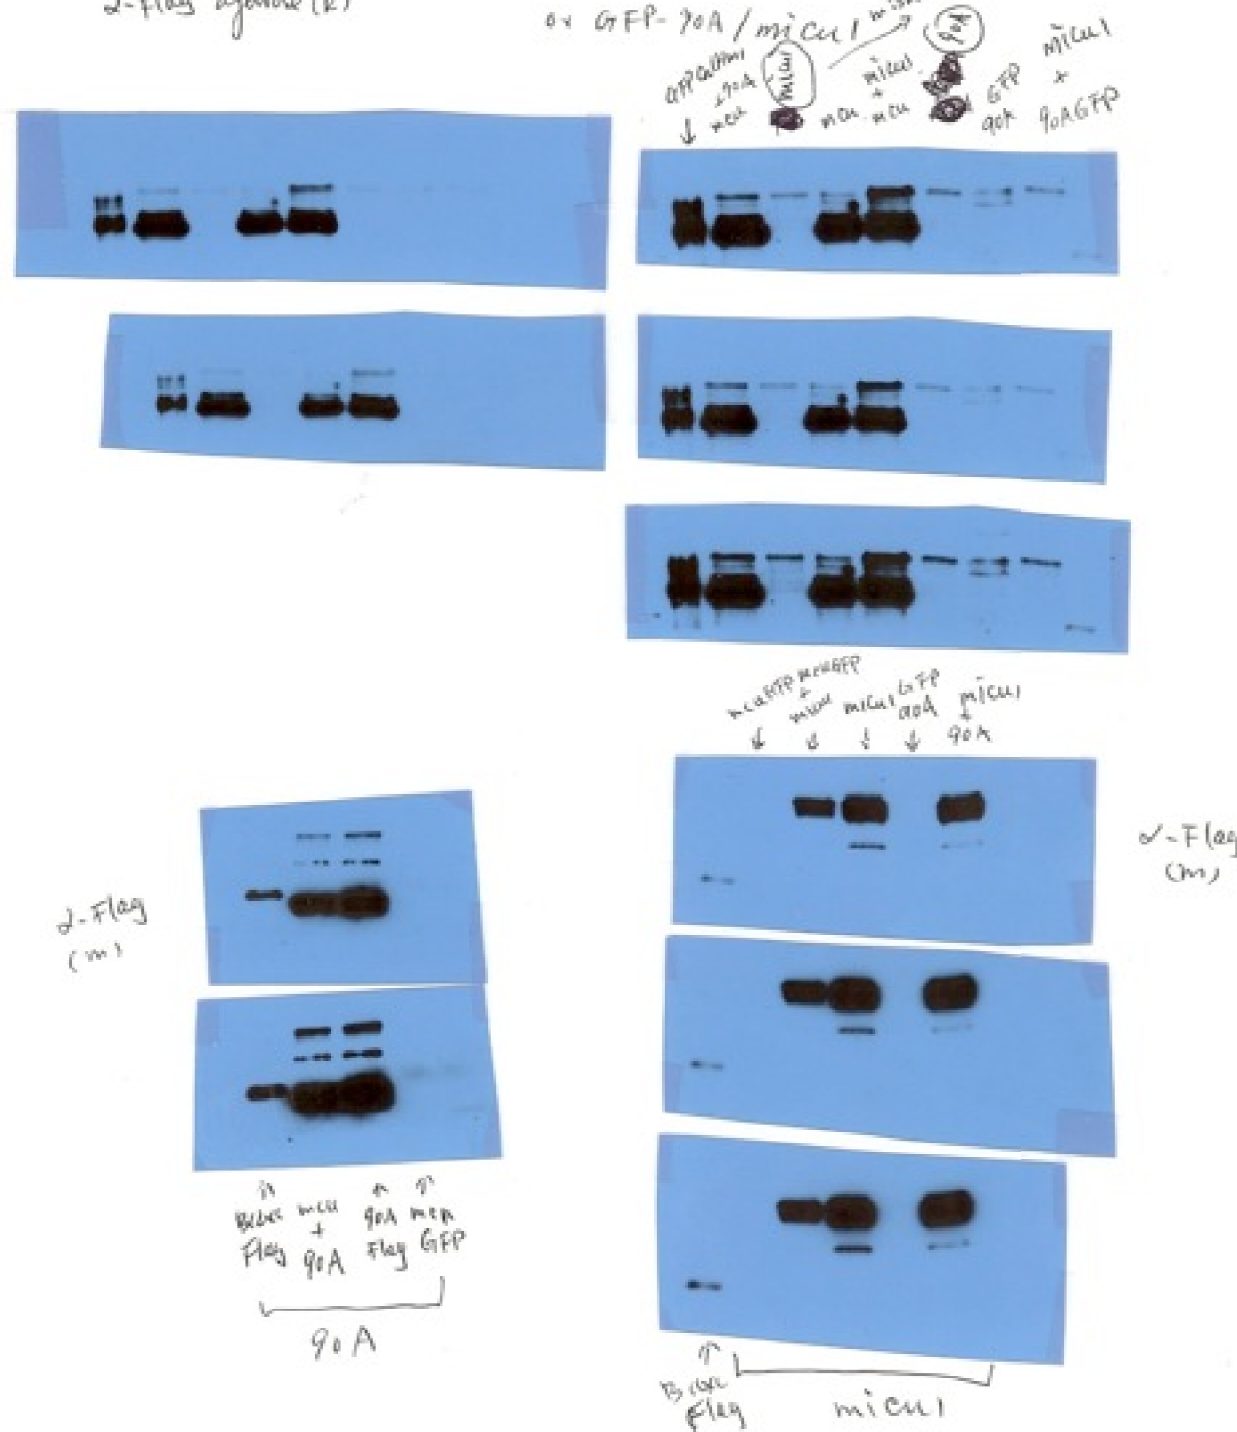

**Related to Supplementary Fig 2k**

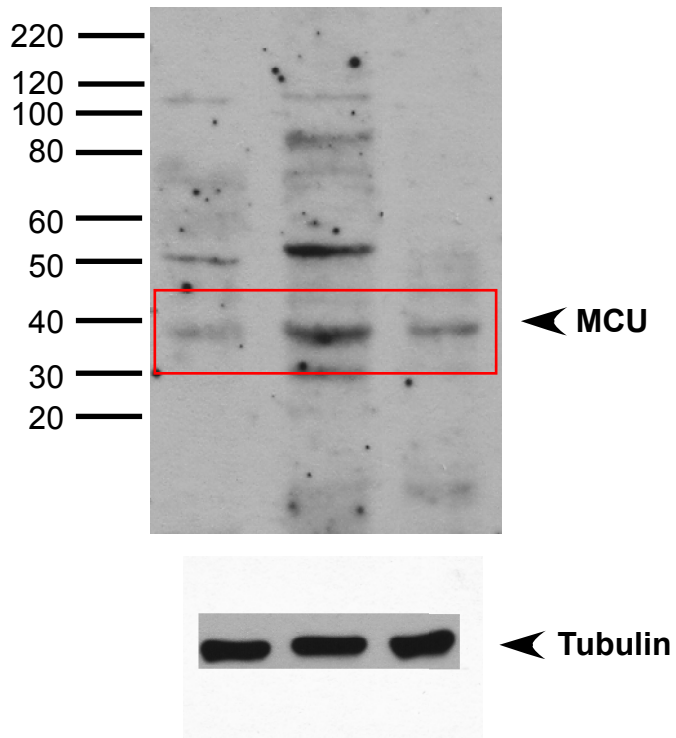

**Related to Supplementary Fig 5c.d.e.f.h.i & k**

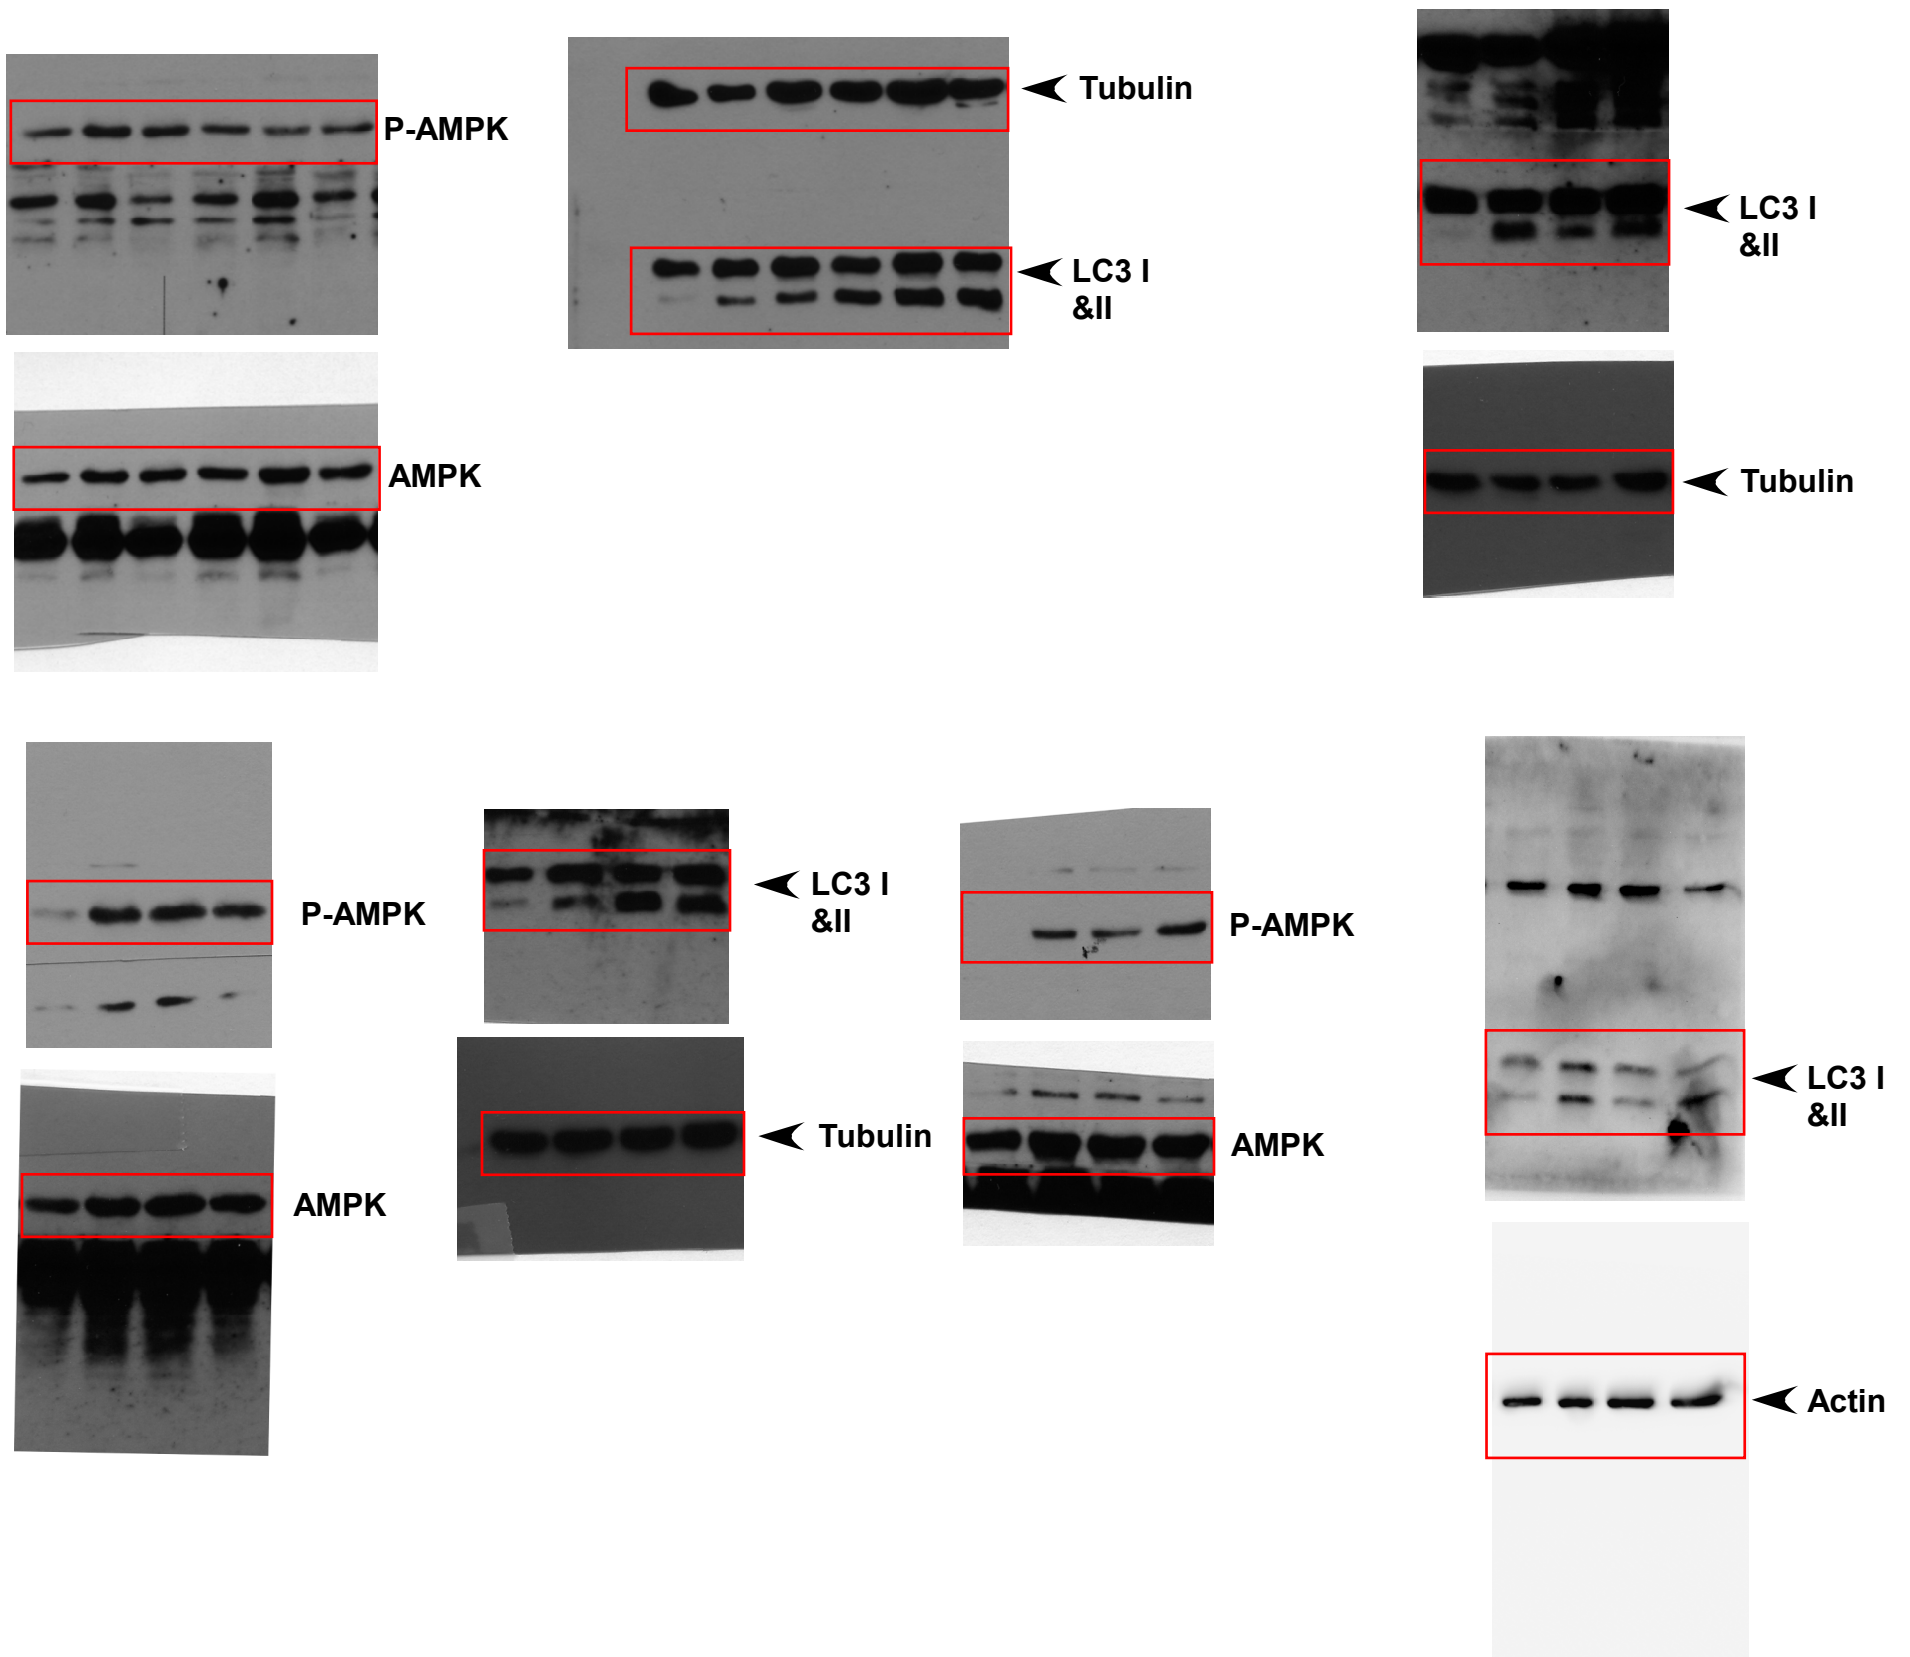



# Related to Supplementary Fig 4a,b & C

2/16-20/12:

- Use last year co-IP lysate, loaded equal amount of lysate

- w.B. use ~~α-DAI~~ α-DAI, COXIV ~~α-DAI~~

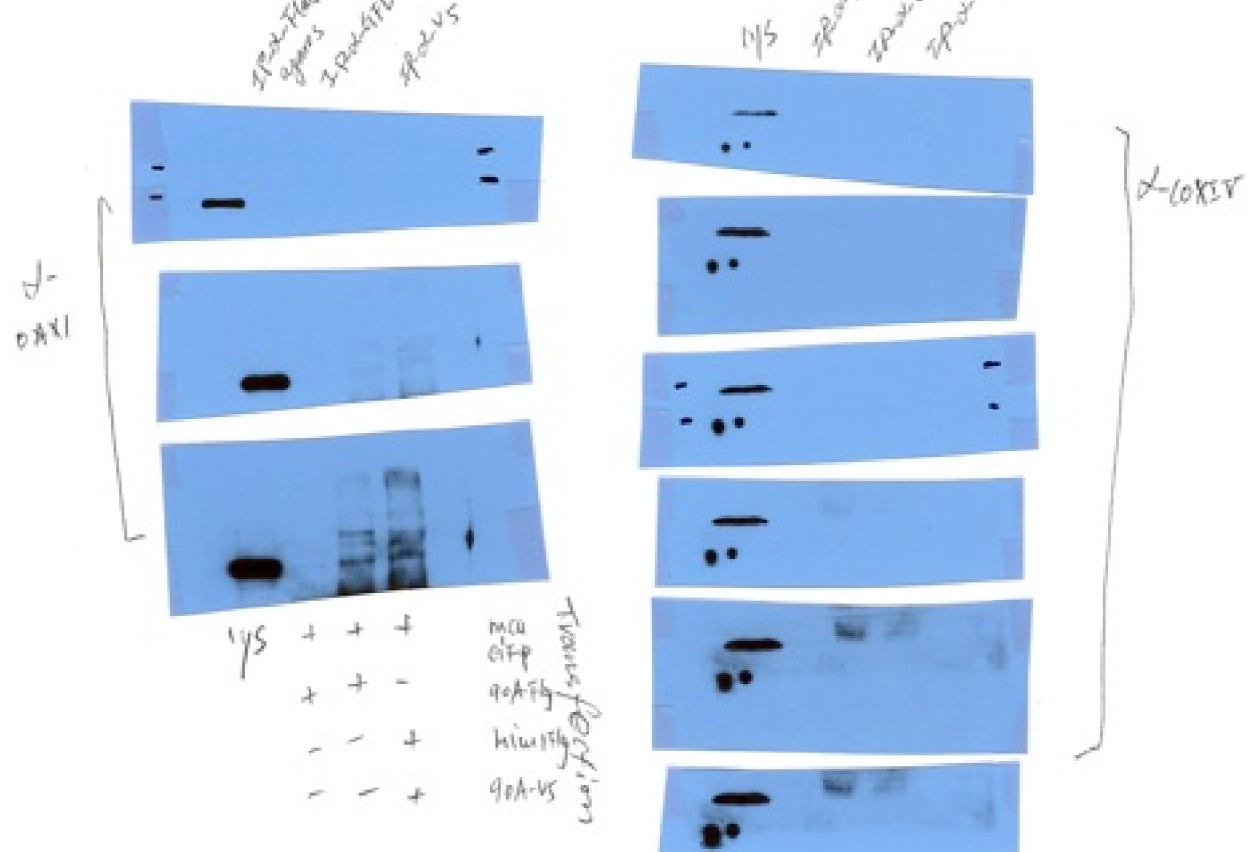

|   |   |   |        |   |   |   |              |
|---|---|---|--------|---|---|---|--------------|
| + | + | + | micu   | + | + | + | transfection |
| + | + | - | GoA    | + | + | + |              |
| - | - | + | micu   | + | + | + |              |
| - | - | + | GoA-V5 | - | - | + |              |

4/12-6/12:

- 1775 Flask 293 all/pull down using 200ug GST fusion protein in 1ml Rcn solution for 2h.

- total elution was loaded onto gel for w.B.

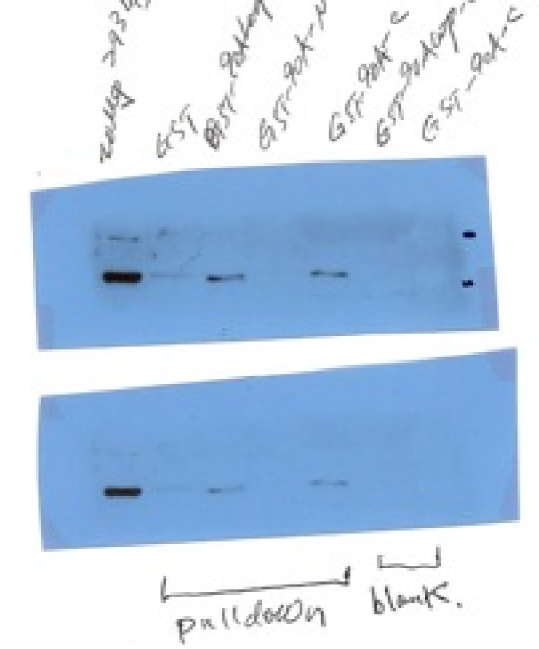

- Test GoA-V5 expression level in transfected COS-7 cells

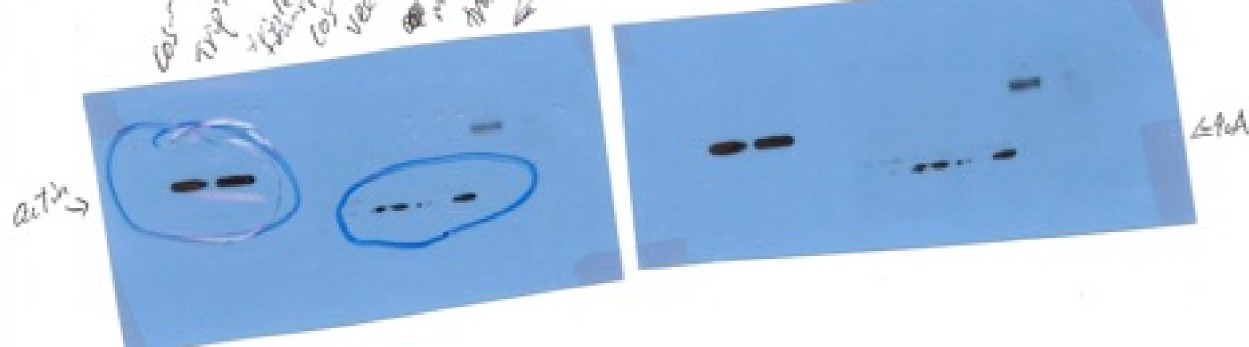

4/17-23/11:

- Cos-7 cells were transfected using micu-Flag, GoA-V5, micu-GFP

- after 20h of transfection, harvest cells and lysate in XPBS

- IP with α-V5 (Covington) or Flag-agarose (Novus) (1:500)

- 4°C O/N.

- Run SDS-PAGE for w.B.

- α-V5 or α-Flag-hrp @

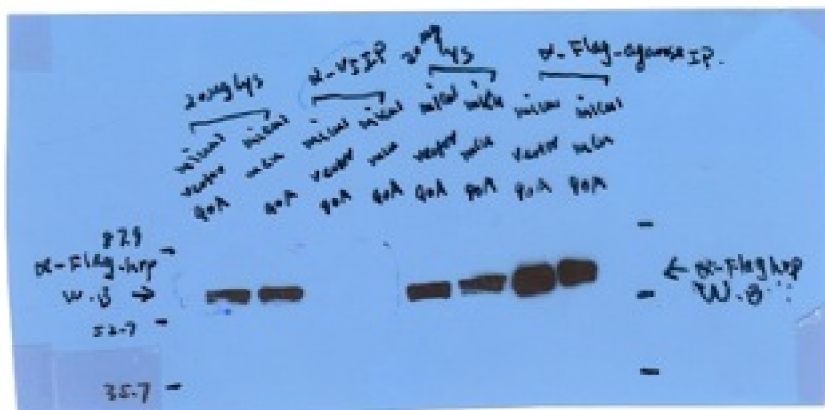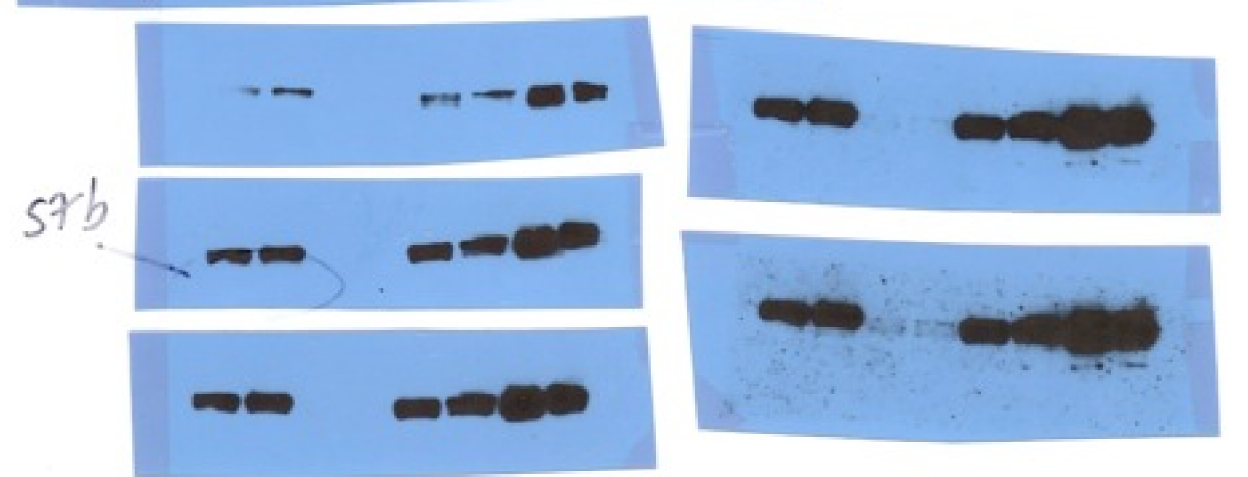

- stripe Flag-w.B. membrane using Thermo-fisher buffer.

- Blot using α-GFP (R) Ab 1:1000, cell signal

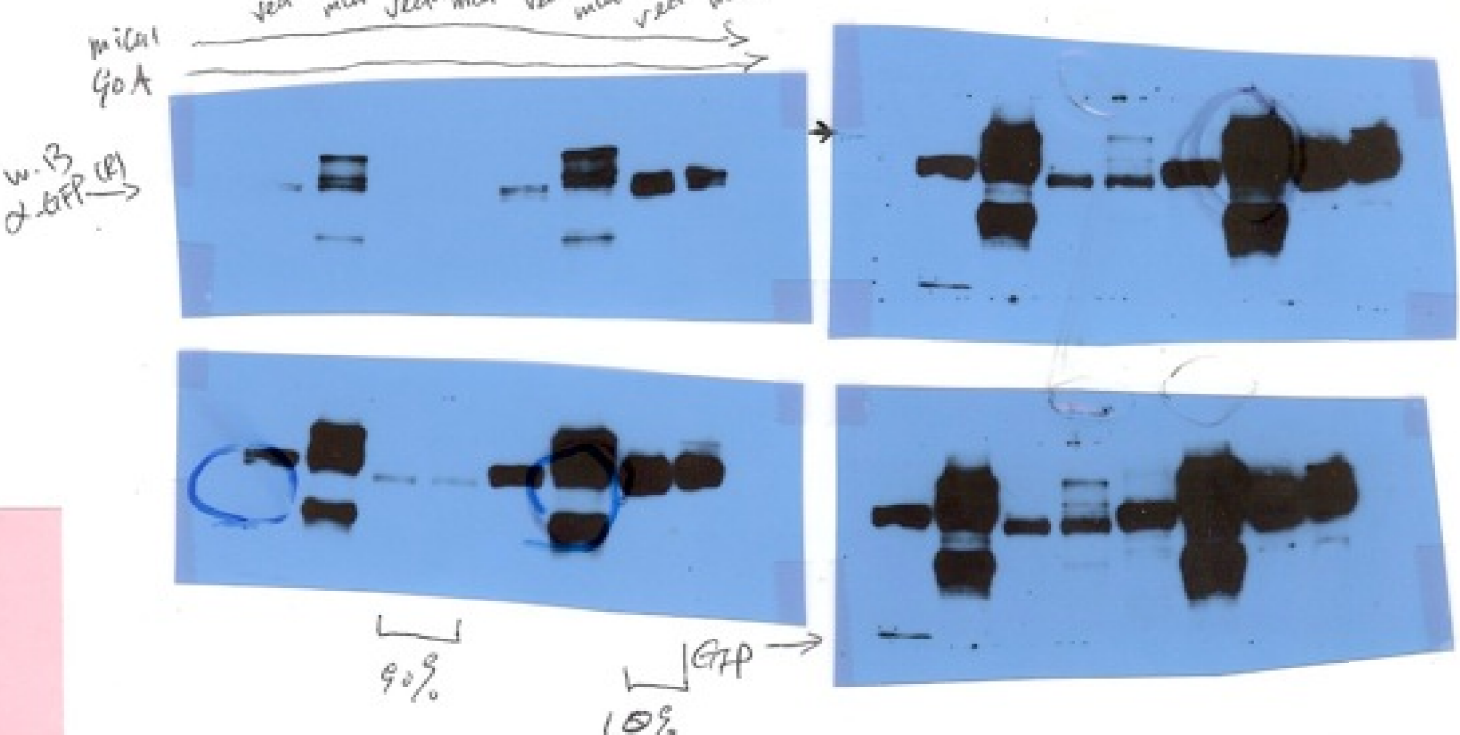

micu →  
GoA →

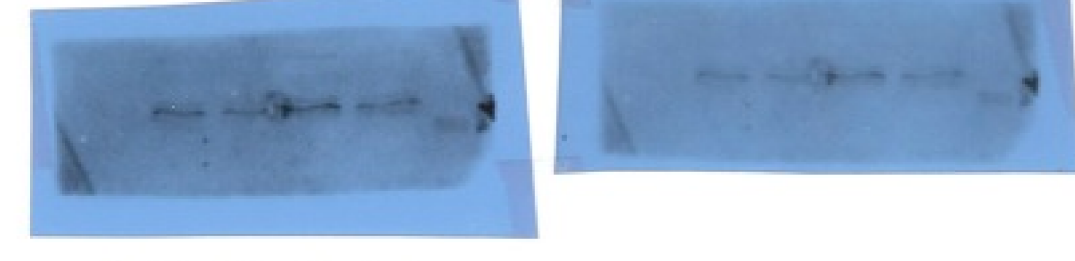

↑ V micu V micu  
lost 1/5 IP

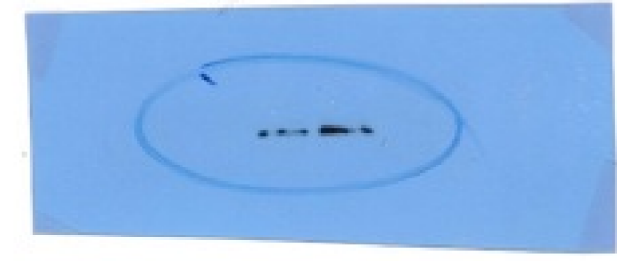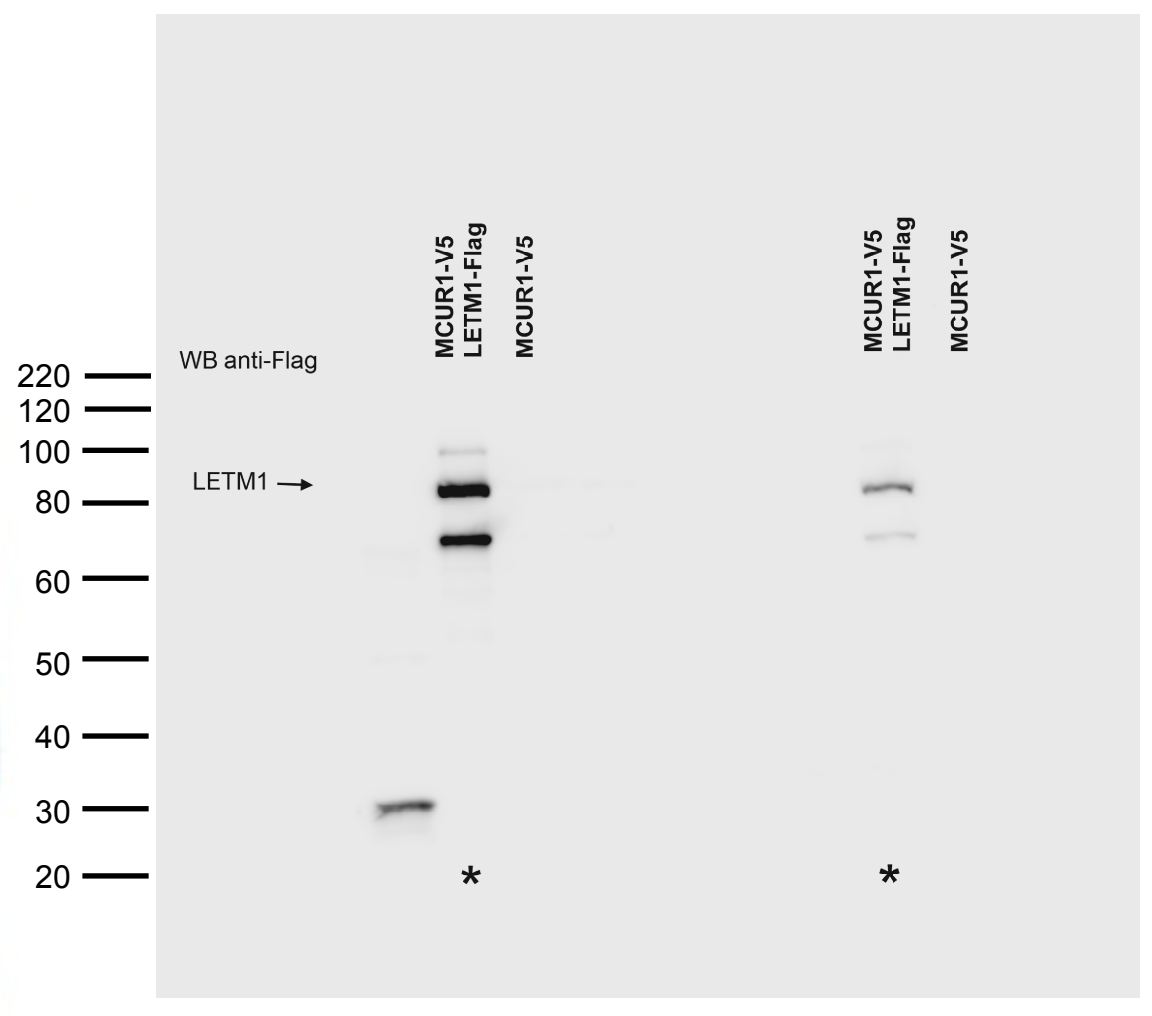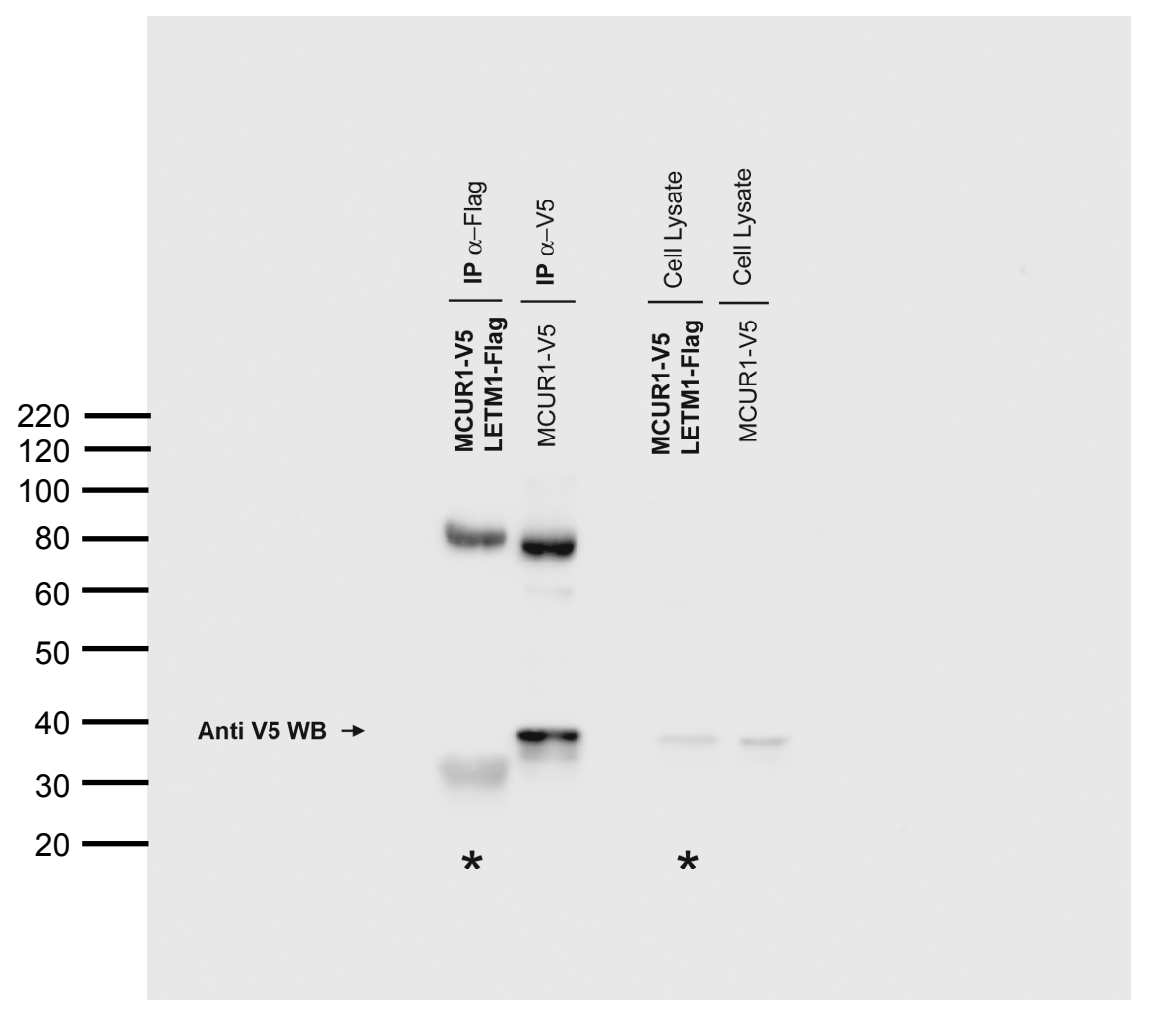

Supplement: NIHMS415407-supplement-7.pdf [file NIHMS415407-supplement-7.pdf]
