# Supplementary material
Source: PubMed Central journal article supplement (PMC3511605)

**a**

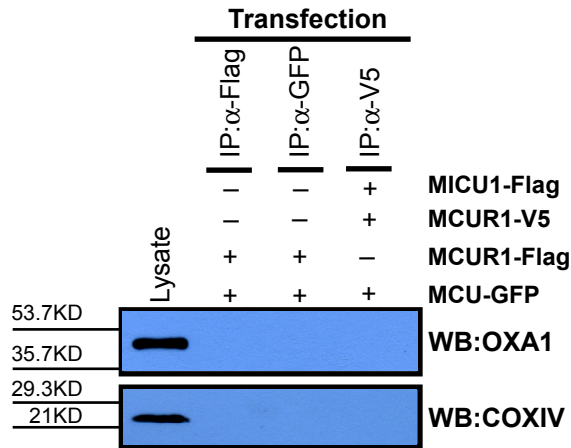

**b**

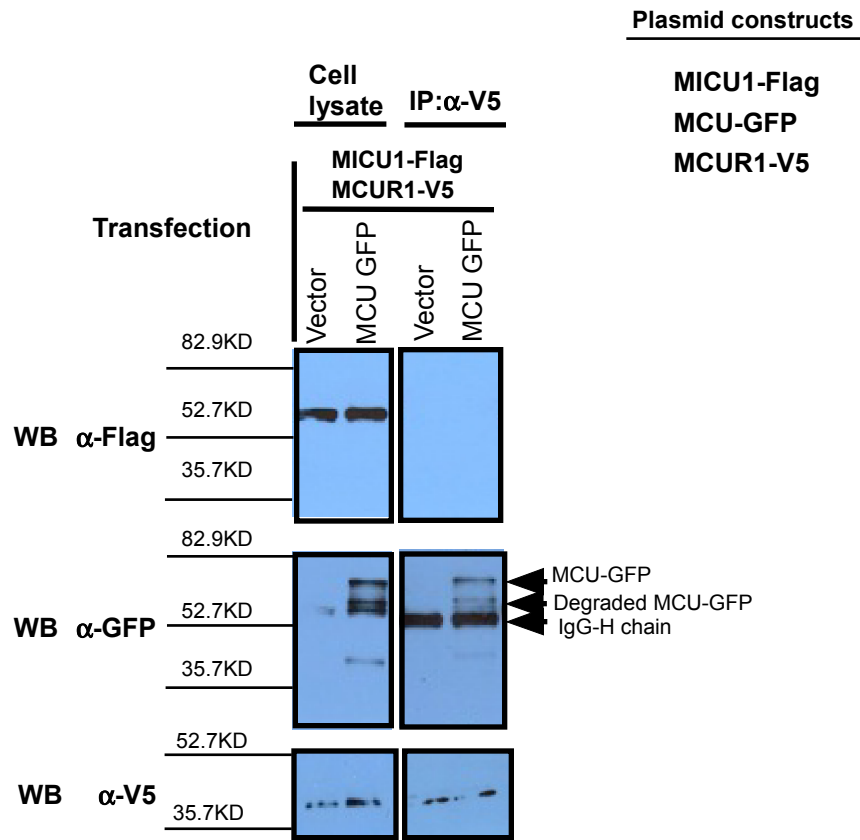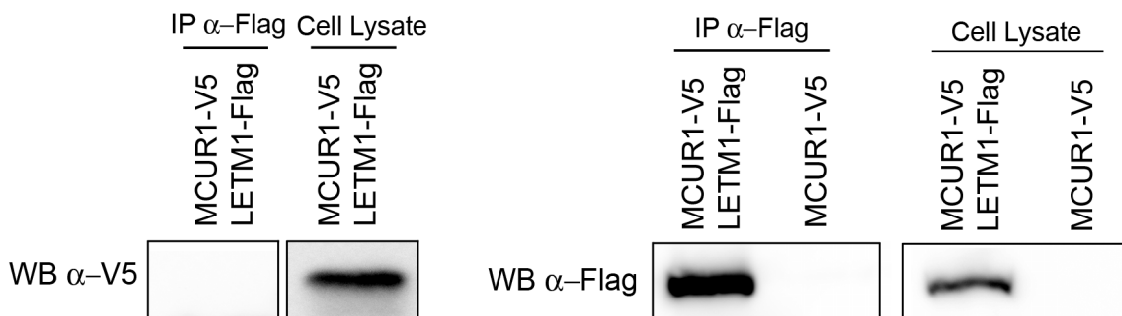

Supplement: NIHMS415407-supplement-5.pdf [file NIHMS415407-supplement-5.pdf]
